# Supplementary material
Source: Springer Nature journal article supplement (https://www.springermedizin.de/resource/supplementary/13045_2013_351_MOESM1_ESM.pdf/9661190)
Supplement: MOESM1 [file 9661190]

**Table S1. TP53 mutational status of the cell lines employed in the study**

| Cell Line | Source                             | TP53 genotype | Mutation                  | Exon | Allelic Status | del17p    |
|-----------|------------------------------------|---------------|---------------------------|------|----------------|-----------|
| EHEB      | Human chronic B cell leukemia      | wt/wt         |                           |      |                | Neg       |
| RAJI      | Human B cell Burkitt lymphoma      | mut/wt        | c.638G>A p.R213Q          | 6    | Heterozygous   | Neg       |
|           |                                    | mut/wt        | c.700T>C p.Y234H          | 7    | Heterozygous   |           |
| MEC-1     | Human chronic B cell leukemia      | mut/del       | c.949_950insC p.Q317fs*29 | 9    | Heterozygous   | Pos (60%) |
| MAVER-1   | Human mantle cell lymphoma         | mut/del       | c.843C>G p.D281E          | 8    | Homozygous     | Pos (90%) |
| HL-60     | Human acute promyelocytic leukemia | del/del       |                           |      |                | Pos(100%) |

Percentage of FISH positive nuclei are reported within parentheses.

**Table S2: Characterization of CLL cases of the training cohort.**

| ID  | Mutation                   | Exon | Del13q    | Tris12    | Del11q    | Del17p    | IGHV status | CD38 | CD49d | ZAP70 |
|-----|----------------------------|------|-----------|-----------|-----------|-----------|-------------|------|-------|-------|
| T1  | c.742C>T p.R248P           | 7    | pos (45%) | neg       | pos (55%) | neg       | UM          | pos  | pos   | n.d.  |
| T2  |                            |      | pos (80%) | neg       | pos (20%) | neg       | M           | neg  | neg   | n.d.  |
| T3  |                            |      | pos (80%) | neg       | neg       | neg       | UM          | neg  | pos   | pos   |
| T4  | c.797G>T p.G266V           | 8    | pos (8%)  | neg       | neg       | neg       | M           | neg  | neg   | pos   |
| T5  |                            |      | neg       | pos (60%) | neg       | neg       | UM          | pos  | pos   | pos   |
| T6  |                            |      | pos (40%) | neg       | neg       | neg       | M           | neg  | neg   | pos   |
| T7  |                            |      | pos (85%) | neg       | neg       | neg       | M           | neg  | neg   | neg   |
| T8  |                            |      | neg       | neg       | neg       | neg       | UM          | pos  | pos   | pos   |
| T9  |                            |      | neg       | neg       | neg       | neg       | UM          | pos  | pos   | neg   |
| T10 | c.517G>A p.V173M           | 5    | neg       | neg       | neg       | pos (80%) | UM          | pos  | pos   | pos   |
| T11 |                            |      | neg       | neg       | neg       | neg       | UM          | neg  | neg   | neg   |
| T12 |                            |      | neg       | neg       | pos (60%) | neg       | UM          | pos  | neg   | neg   |
| T13 |                            |      | pos (81%) | neg       | neg       | pos (10%) | n.d.        | neg  | neg   | pos   |
| T14 | c.701A>C p.Y234S           | 7    | neg       | neg       | neg       | neg       | UM          | pos  | pos   | n.d.  |
| T15 |                            |      | pos (90%) | neg       | neg       | pos (15%) | n.d.        | neg  | neg   | pos   |
| T16 |                            |      | neg       | neg       | neg       | pos (70%) | UM          | pos  | pos   | pos   |
| T17 | c.584T>C p.I195T           | 6    | pos (80%) | neg       | neg       | pos (82%) | M           | neg  | neg   | pos   |
| T18 |                            |      | pos (71%) | neg       | neg       | neg       | M           | neg  | pos   | pos   |
| T19 | c.724T>C p.C242R           | 7    | neg       | pos (5%)  | neg       | pos (14%) | UM          | neg  | pos   | pos   |
| T20 |                            |      | pos (17%) | neg       | neg       | neg       | M           | neg  | neg   | pos   |
| T21 |                            |      | neg       | pos (67%) | neg       | neg       | UM          | neg  | pos   | neg   |
| T22 |                            |      | pos (76%) | neg       | neg       | neg       | M           | neg  | neg   | pos   |
| T23 |                            |      | neg       | pos (35%) | neg       | neg       | UM          | pos  | pos   | pos   |
| T24 |                            |      | neg       | neg       | pos (6%)  | pos (5%)  | M           | neg  | pos   | pos   |
| T25 | c.818G>A p.R273H           | 8    | pos (55%) | neg       | neg       | pos (53%) | UM          | pos  | neg   | pos   |
| T26 |                            |      | neg       | neg       | neg       | neg       | M           | neg  | neg   | pos   |
| T27 |                            |      | neg       | neg       | neg       | neg       | UM          | neg  | pos   | pos   |
| T28 |                            |      | pos (84%) | neg       | neg       | neg       | M           | neg  | neg   | neg   |
| T29 |                            |      | neg       | neg       | neg       | neg       | n.d.        | pos  | pos   | pos   |
| T30 |                            |      | pos (38%) | neg       | neg       | neg       | M           | neg  | neg   | neg   |
| T31 |                            |      | neg       | pos (72%) | neg       | neg       | UM          | neg  | pos   | neg   |
| T32 |                            |      | pos (32%) | neg       | neg       | neg       | M           | neg  | neg   | neg   |
| T33 | c.97-2A>T                  | i3   | pos (61%) | neg       | neg       | pos (38%) | M           | neg  | neg   | pos   |
| T34 |                            |      | neg       | neg       | neg       | neg       | M           | neg  | neg   | pos   |
| T35 |                            |      | pos (55%) | neg       | pos (5%)  | neg       | UM          | pos  | neg   | pos   |
| T36 |                            |      | pos (15%) | pos (71%) | neg       | neg       | Biclon. UM  | pos  | pos   | pos   |
| T37 |                            |      | neg       | neg       | neg       | neg       | UM          | pos  | pos   | pos   |
| T38 |                            |      | pos (50%) | neg       | neg       | neg       | M           | neg  | neg   | neg   |
| T39 |                            |      | pos (15%) | neg       | neg       | neg       | M           | neg  | pos   | neg   |
| T40 |                            |      | pos (70%) | neg       | neg       | neg       | Biclon. M   | neg  | neg   | neg   |
| T41 |                            |      | neg       | pos (70%) | neg       | neg       | M           | neg  | pos   | neg   |
| T42 |                            |      | pos (71%) | neg       | neg       | neg       | M           | neg  | neg   | neg   |
| T43 |                            |      | pos (15%) | neg       | neg       | neg       | M           | neg  | neg   | neg   |
| T44 |                            |      | neg       | neg       | neg       | neg       | UM          | pos  | neg   | neg   |
| T45 |                            |      | neg       | neg       | neg       | neg       | M           | pos  | neg   | neg   |
| T46 |                            |      | pos (92%) | neg       | neg       | neg       | M           | neg  | neg   | neg   |
| T47 |                            |      | neg       | neg       | neg       | neg       | M           | neg  | neg   | n.d.  |
| T48 |                            |      | neg       | neg       | pos (83%) | neg       | UM          | neg  | neg   | pos   |
| T49 |                            |      | pos (60%) | neg       | pos (60%) | pos (10%) | UM          | pos  | pos   | pos   |
| T50 | c.578A>T p.H193L           | 6    | pos (95%) | neg       | neg       | pos (90%) | n.d.        | neg  | neg   | pos   |
| T51 |                            |      | pos (32%) | neg       | neg       | pos (18%) | n.d.        | neg  | neg   | n.d.  |
| T52 | c.713G>T p.C238F           | 7    | pos (85%) | neg       | pos (65%) | pos (40%) | M           | neg  | neg   | pos   |
| T53 | c.814G>T p.V272L           | 8    | neg       | neg       | neg       | pos (70%) | M           | neg  | pos   | neg   |
| T54 |                            |      | neg       | neg       | pos (80%) | pos (9%)  | UM          | pos  | pos   | neg   |
| T55 | c.824G>T p.C275F           | 8    | neg       | neg       | neg       | pos (60%) | M           | neg  | pos   | n.d.  |
| T56 | c.845G>C p.R282P           | 8    | neg       | neg       | neg       | pos (30%) | UM          | neg  | neg   | n.d.  |
| T57 |                            |      | neg       | pos (30%) | neg       | pos (10%) | UM          | pos  | neg   | pos   |
| T58 |                            |      | neg       | pos (70%) | pos (80%) | neg       | UM          | pos  | pos   | n.d.  |
| T59 | c.484A>T p.I162F           | 5    | neg       | neg       | neg       | neg       | UM          | neg  | pos   | n.d.  |
| T60 | c.745A>T p.R249W           | 7    |           |           |           |           |             |      |       |       |
| T61 | c.818G>A p.R273H           | 8    | pos (70%) | neg       | neg       | neg       | UM          | neg  | neg   | pos   |
| T62 |                            |      | neg       | pos (25%) | neg       | pos (18%) | UM          | neg  | neg   | neg   |
| T63 |                            |      | neg       | pos (61%) | neg       | neg       | UM          | pos  | pos   | neg   |
| T64 |                            |      | pos (65%) | neg       | neg       | neg       | M           | pos  | pos   | neg   |
| T65 |                            |      | pos (12%) | neg       | pos (72%) | neg       | Biclon. UM  | pos  | pos   | pos   |
| T66 |                            |      | pos (89%) | pos (15%) | pos (80%) | neg       | UM          | neg  | neg   | pos   |
| T67 |                            |      | pos (52%) | neg       | neg       | pos (6%)  | M           | neg  | neg   | pos   |
| T68 |                            |      | neg       | neg       | pos (10%) | pos (6%)  | UM          | neg  | neg   | pos   |
| T69 | c.626_627delGA p.R209Kfs*6 | 6    | pos (87%) | neg       | neg       | pos (8%)  | M           | neg  | neg   | pos   |
| T70 |                            |      | pos (90%) | neg       | pos (15%) | neg       | M           | neg  | neg   | pos   |
| T71 |                            |      | neg       | neg       | pos (80%) | neg       | nd          | neg  | neg   | n.d.  |
| T72 |                            |      | pos (75%) | neg       | neg       | pos (61%) | UM          | neg  | pos   | neg   |

|      |                  |   |           |           |           |           |      |      |      |      |
|------|------------------|---|-----------|-----------|-----------|-----------|------|------|------|------|
| T72  |                  |   | neg       | pos (80%) | pos (81%) | neg       | UM   | pos  | pos  | pos  |
| T73  |                  |   | neg       | pos (66%) | pos (7%)  | neg       | UM   | pos  | pos  | pos  |
| T74  |                  |   | neg       | neg       | pos (36%) | neg       | UM   | neg  | neg  | pos  |
| T75  |                  |   | neg       | pos (66%) | neg       | neg       | UM   | pos  | pos  | pos  |
| T76  |                  |   | pos (8%)  | neg       | pos (9%)  | neg       | UM   | neg  | neg  | pos  |
| T77  |                  |   | pos (5%)  | neg       | pos (73%) | neg       | UM   | pos  | neg  | pos  |
| T78  |                  |   | pos (60%) | neg       | neg       | neg       | UM   | neg  | neg  | pos  |
| T79  |                  |   | pos (64%) | neg       | neg       | neg       | M    | neg  | neg  | neg  |
| T80  |                  |   | pos (72%) | neg       | neg       | neg       | UM   | pos  | neg  | pos  |
| T81  |                  |   | pos (77%) | neg       | neg       | neg       | n.d. | neg  | neg  | neg  |
| T82  |                  |   | pos (74%) | neg       | neg       | neg       | M    | neg  | neg  | neg  |
| T83  |                  |   | pos (65%) | pos (66%) | neg       | neg       | M    | pos  | pos  | neg  |
| T84  |                  |   | neg       | neg       | neg       | neg       | UM   | pos  | pos  | pos  |
| T85  |                  |   | pos (40%) | pos (49%) | pos (5%)  | neg       | UM   | neg  | pos  | neg  |
| T86  |                  |   | pos (60%) | pos (66%) | neg       | neg       | M    | neg  | pos  | neg  |
| T87  |                  |   | pos (49%) | neg       | neg       | neg       | M    | pos  | pos  | pos  |
| T88  |                  |   | neg       | neg       | neg       | neg       | M    | neg  | neg  | neg  |
| T89  |                  |   | neg       | neg       | neg       | neg       | M    | neg  | pos  | neg  |
| T90  |                  |   | pos (64%) | neg       | neg       | neg       | n.d. | neg  | neg  | neg  |
| T91  | c.989T>C p.L330P | 9 | pos (6%)  | neg       | neg       | pos (81%) | UM   | neg  | n.d. | neg  |
| T92  | c.818G>A p.R273H | 8 | pos (95%) | neg       | neg       | neg       | M    | neg  | n.d. | neg  |
| T93  | c.742C>T p.R248W | 7 | neg       | neg       | neg       | neg       | UM   | pos  | n.d. | neg  |
| T94  | c.824G>A p.C275Y | 8 | neg       | pos (70%) | neg       | pos (73%) | UM   | pos  | n.d. | neg  |
| T95  | c.847C>T p.A283C | 8 | pos (32%) | neg       | neg       | neg       | M    | neg  | n.d. | neg  |
| T96  | c.818G>A p.A273H | 8 | pos (90%) | neg       | neg       | pos (50%) | M    | neg  | n.d. | neg  |
| T97  | c.338T>C p.F113S | 4 | pos (6%)  | neg       | neg       | pos (5%)  | UM   | pos  | n.d. | pos  |
| T98  | c.961A>T p.K321* | 9 | neg       | neg       | pos (5%)  | pos (6%)  | M    | n.d. | n.d. | n.d. |
| T99  | c.722C>T p.S241F | 7 | neg       | neg       | pos (57%) | pos (96%) | UM   | pos  | n.d. | neg  |
| T100 | c.378C>G p.Y126* | 5 | neg       | neg       | neg       | pos (95%) | UM   | neg  | n.d. | pos  |

pos: positive; neg: negative; biclon: biclonal; M: mutated; UM: unmutated; n.d.: not determined

Cut-off for CD38 and CD49d: 30% of expressing cells; cut-off for ZAP70: 20% of expressing cells; cut-off for FISH (del13q, tris12, del11q, del17p probes): 5% of deleted nuclei

Percentage of FISH positive nuclei are reported within parentheses

**Table S3: Characterization of CLL cases of the validation cohort.**

| ID  | Mutation                                               | Exon   | Tris12    | Del13q    | Del11q      | Del17p     | IGHV status | CD38 | CD49d | ZAP70 |
|-----|--------------------------------------------------------|--------|-----------|-----------|-------------|------------|-------------|------|-------|-------|
| V1  | c.742C>T p.R248W                                       | 7      | neg       | pos (82%) | pos (81%)   | pos (49%)  | UM          | pos  | pos   | neg   |
| V2  | c.312delG; p.G105fs*18<br>c.673-2A>T                   | 4<br>7 | neg       | neg       | neg         | neg        | UM          | neg  | neg   | neg   |
| V4  |                                                        | 0      | neg       | neg       | neg         | neg        | UM          | neg  | neg   | neg   |
| V5  | c.731G>A p.G244D<br>c.733G>A p.G245S                   | 7<br>7 | neg       | neg       | neg         | neg        | UM          | pos  | pos   | pos   |
| V6  |                                                        | 0      | neg       | pos (18%) | neg         | neg        | M           | neg  | neg   | neg   |
| V7  |                                                        | 0      | pos (62%) | neg       | neg         | neg        | M           | pos  | neg   | neg   |
| V8  | c.470T>G p.V157G<br>c.785G>T p.G262V                   | 5<br>8 | neg       | neg       | neg         | neg        | UM          | neg  | pos   | neg   |
| V9  | c.809T>C p.F270S                                       | 8      | neg       | pos (75%) | neg         | pos (37%)  | M           | neg  | neg   | neg   |
| V10 | c.761T>C p.I254T                                       | 7      | neg       | pos (63%) | neg         | pos (63%)  | UM          | neg  | neg   | neg   |
| V11 |                                                        | 0      | neg       | neg       | neg         | neg        | UM          | neg  | neg   | neg   |
| V12 | c.687T>A p.C229*                                       | 7      | neg       | neg       | neg         | neg        | UM          | neg  | neg   | neg   |
| V13 | c.672+1G>T                                             | 6      | pos (12%) | pos (62%) | neg         | neg        | M           | n.d. | n.d.  | neg   |
| V14 |                                                        | 0      | pos (89%) | neg       | pos (9%)    | neg        | UM          | neg  | pos   | pos   |
| V15 |                                                        | 0      | neg       | pos (85%) | pos (81%)   | neg        | UM          | neg  | neg   | neg   |
| V16 |                                                        | 0      | pos (61%) | neg       | neg         | neg        | M           | neg  | neg   | neg   |
| V17 |                                                        | 0      | neg       | pos (75%) | neg         | neg        | M           | pos  | pos   | neg   |
| V18 |                                                        | 0      | neg       | pos (79%) | neg         | neg        | M           | n.d. | neg   | neg   |
| V19 |                                                        | 0      | pos (85%) | neg       | pos (14%)   | neg        | UM          | pos  | pos   | neg   |
| V20 | c.532delC p.H178fs*69<br>c.892G>T p.E298*              | 5<br>8 | neg       | pos (80%) | neg         | pos (25%)  | M           | pos  | pos   | neg   |
| V21 | c.613T>G p.Y205D                                       | 6      | neg       | pos (72%) | neg         | pos (45%)  | UM          | neg  | pos   | neg   |
| V22 | c.733G>A p.G245S                                       | 7      | neg       | pos (54%) | neg         | pos (60%)  | M           | neg  | neg   | neg   |
| V23 | c.757A>C p.T253P                                       | 7      | neg       | neg       | neg         | pos (45%)  | M           | neg  | pos   | pos   |
| V24 | c.584T>C p.I195T                                       | 6      | neg       | n.d.      | neg         | pos (77%)  | M           | neg  | neg   | n.d.  |
| V25 |                                                        | 0      | neg       | neg       | neg         | pos (6%)   | UM          | pos  | pos   | pos   |
| V26 | c.742C>G p.R248G                                       | 7      | pos (55%) | neg       | neg         | neg        | UM          | neg  | pos   | pos   |
| V27 | c.844C>T p.R282W                                       | 8      | neg       | pos (14%) | neg         | neg        | UM          | pos  | pos   | pos   |
| V28 | c.626_627delGA p.R209fs*6                              | 6      | neg       | neg       | pos (12,5%) | neg        | M           | neg  | neg   | neg   |
| V29 | c.818G>A p.R273H                                       | 8      | neg       | n.d.      | neg         | neg        | M           | neg  | neg   | n.d.  |
| V30 | c.590T>A p.V197E                                       | 6      | neg       | neg       | neg         | neg        | UM          | pos  | pos   | neg   |
| V32 | c.469 G>T p.V157F                                      | 5      | neg       | pos (39%) | neg         | pos (36%)  | Biclon. M   | n.d. | n.d.  | neg   |
| V33 |                                                        | 0      | neg       | pos (81%) | pos (80%)   | neg        | UM          | pos  | pos   | neg   |
| V34 |                                                        | 0      | pos (50%) | neg       | neg         | pos (9,3%) | M           | neg  | neg   | neg   |
| V35 |                                                        | 0      | neg       | pos (48%) | neg         | pos (6%)   | M           | neg  | neg   | pos   |
| V36 | c.916C>T p.R306*                                       | 8      | neg       | n.d.      | neg         | pos (19%)  | UM          | pos  | neg   | neg   |
| V37 |                                                        | 0      | neg       | pos (70%) | neg         | neg        | Biclon. M   | neg  | pos   | pos   |
| V38 |                                                        | 0      | neg       | pos (93%) | neg         | neg        | UM          | pos  | pos   | pos   |
| V39 | c.758_764del6 p.I254_I255del                           | 7      | neg       | neg       | neg         | pos (83%)  | M           | neg  | pos   | neg   |
| V40 | c.272_293del23 p.W91fs*49<br>c.630_631delCA p.T211fs*4 | 4<br>6 | neg       | neg       | neg         | pos (10%)  | M           | pos  | neg   | neg   |
| V41 | c.590T>A p.V197E                                       | 6      | neg       | neg       | neg         | neg        | UM          | pos  | pos   | neg   |
| V42 | c.590T>A p.V197E                                       | 6      | neg       | pos (30%) | neg         | neg        | M           | neg  | neg   | pos   |

pos: positive; neg: negative; biclon: biclonal; M: mutated; UM: unmutated; n.d.: not determined

Cut-off for CD38 and CD49d: 30% of expressing cells; cut-off for ZAP70: 20% of expressing cells; cut-off for FISH (del13q, tris12, del11q, del17p probes): 5% of deleted nuclei

Percentage of FISH positive nuclei are reported within parentheses

Table S4. Validation cohort: evaluation "in blind" of 5 independent data analyzers.

| ID  | TP53 genotype | A1 | A2 | A3 | A4 | A5 |
|-----|---------------|----|----|----|----|----|
| V1  | del/mut       | D  | D  | D  | D  | D  |
| V2  | mut/wt        | D  | D  | D  | D  | D  |
| V4  | wt/wt         | N  | N  | N  | N  | N  |
| V5  | mut/wt        | D  | D  | D  | D  | D  |
| V6  | wt/wt         | D  | D  | D  | D  | D  |
| V7  | wt/wt         | N  | N  | N  | N  | N  |
| V8  | mut/wt        | D  | D  | D  | D  | D  |
| V9  | del/mut       | D  | D  | D  | D  | D  |
| V10 | del/mut       | D  | D  | D  | D  | D  |
| V11 | wt/wt         | N  | N  | N  | N  | N  |
| V12 | mut/wt        | D  | D  | D  | D  | D  |
| V13 | mut/wt        | D  | D  | D  | D  | D  |
| V14 | wt/wt         | N  | N  | N  | N  | N  |
| V15 | wt/wt         | N  | N  | N  | N  | N  |
| V16 | wt/wt         | D  | D  | D  | D  | D  |
| V17 | wt/wt         | N  | N  | N  | N  | N  |
| V18 | wt/wt         | N  | N  | N  | N  | N  |
| V19 | wt/wt         | N  | N  | N  | N  | N  |
| V20 | del/mut       | D  | D  | D  | D  | D  |
| V21 | del/mut       | D  | D  | D  | D  | D  |
| V22 | del/mut       | D  | D  | D  | D  | D  |
| V23 | del/mut       | D  | D  | D  | D  | D  |
| V24 | del/mut       | D  | D  | D  | D  | D  |
| V25 | del/wt        | N  | N  | N  | N  | N  |
| V26 | mut/wt        | D  | D  | D  | D  | D  |
| V27 | mut/wt        | D  | D  | D  | D  | D  |
| V28 | mut/wt        | D  | D  | D  | D  | D  |
| V29 | mut/wt        | D  | N  | N  | D  | N  |
| V30 | mut/wt        | D  | D  | D  | D  | D  |
| V32 | del/mut       | D  | D  | D  | D  | D  |
| V33 | wt/wt         | N  | N  | N  | N  | N  |
| V34 | del/wt        | N  | N  | N  | N  | N  |
| V35 | del/wt        | N  | N  | N  | N  | N  |
| V36 | del/mut       | D  | D  | D  | D  | D  |
| V37 | wt/wt         | N  | N  | N  | N  | N  |
| V38 | wt/wt         | N  | N  | N  | N  | N  |
| V39 | del/mut       | D  | D  | D  | D  | D  |
| V40 | del/mut       | N  | N  | N  | N  | N  |
| V41 | mut/wt        | D  | D  | D  | D  | D  |
| V42 | mut/wt        | N  | D  | N  | N  | N  |

Columns A1-A5 indicate evaluations of the 5 independent data analyzers; D, dysfunction; N, normal.

**Table S5: Characterization of CLL cases used for the comparison experiments.**

| ID  | Match | Mutation         | Exon | Tris12    | Del13q    | Del11q    | Del17p    | IGHV status | CD38        | CD49d       | ZAP70     |
|-----|-------|------------------|------|-----------|-----------|-----------|-----------|-------------|-------------|-------------|-----------|
| C1  | V16   |                  |      | pos (61%) | neg       | neg       | neg       | M           | neg         | neg         | neg       |
| C2  | V4    |                  |      | neg       | neg       | neg       | neg       | UM          | neg         | neg         | neg       |
| C3  | T45   |                  |      | neg       | neg       | neg       | neg       | M           | pos (63,8%) | neg         | neg       |
| C4  | V15   |                  |      | neg       | pos (85%) | pos (81%) | pos (5%)  | UM          | neg         | neg         | neg       |
| C5  | V19   |                  |      | pos (85%) | neg       | pos (10%) | neg       | UM          | pos (98%)   | pos (99,8%) | neg       |
| C6  | T64   |                  |      | neg       | pos (12%) | pos (72%) | neg       | Biclon. UM  | pos (78,3%) | pos (41,1%) | pos (33%) |
| C7  | T65   |                  |      | pos (15%) | pos (89%) | pos (80%) | neg       | UM          | neg         | neg         | pos (54%) |
| C8  | V27   | c.844C>T p.R282W | 8    | neg       | pos (14%) | neg       | neg       | UM          | pos (71,7%) | pos (98,4%) | pos (40%) |
| C9  | V29   | c.818G>A p.R273H | 8    | neg       | n.d.      | neg       | neg       | M           | neg         | neg         | n.d.      |
| C10 | T19   | c.724T>C p.C242R | 7    | neg       | neg       | neg       | pos (14%) | UM          | neg         | pos (59,6%) | pos (20%) |

pos: positive; neg: negative; biclon: biclonal; M: mutated; UM: unmutated; n.d.: not determined

Cut-off for CD38 and CD49d: 30% of expressing cells; cut-off for ZAP70: 20% of expressing cells; cut-off for FISH (del13q, tris12, del11q, del17p probes): 5% of deleted nuclei

Percentage of FISH positive nuclei are reported within parentheses

**Table S6: Median fluorescence intensity values for TP53 and CDKN1A protein expression by FACS analysis**

|             | TP53      |           |                      |          | CDKN1A    |           |                      |          |
|-------------|-----------|-----------|----------------------|----------|-----------|-----------|----------------------|----------|
|             | Untreated | Etoposide | Etoposide + Nutlin-3 | Nutlin-3 | Untreated | Etoposide | Etoposide + Nutlin-3 | Nutlin-3 |
| <b>EHEB</b> | 85        | 135       | 383                  | 236      | 342       | 932       | 1777                 | 1048     |
| <b>RAJI</b> | 1427      | 2257      | 2176                 | 2470     | 265       | 360       | 324                  | 306      |
| <b>MEC1</b> | 218       | 293       | 323                  | 214      | 284       | 290       | 311                  | 288      |
| <b>HL60</b> | 94        | 122       | 126                  | 108      | 151       | 140       | 144                  | 166      |
| <b>C1</b>   | 148       | 423       | 934                  | 225      | 405       | 1548      | 2223                 | 492      |
| <b>C2</b>   | 124       | 489       | 1368                 | 462      | 500       | 2890      | 3778                 | 943      |
| <b>C3</b>   | 12        | 474       | 805                  | 92       | 40        | 1516      | 1838                 | 225      |
| <b>C4</b>   | 150       | 288       | 796                  | 418      | 859       | 1087      | 4135                 | 940      |
| <b>C5</b>   | 220       | 612       | 2587                 | 898      | 1075      | 2135      | 1440                 | 1069     |
| <b>C6</b>   | 5         | 20        | 513                  | 164      | 4         | 38        | 132                  | 11       |
| <b>C7</b>   | 15        | 142       | 456                  | 192      | 20        | 93        | 149                  | 12       |
| <b>C8</b>   | 5         | 104       | 115                  | 50       | 2         | 18        | 12                   | 7        |
| <b>C9</b>   | 3         | 119       | 99                   | 72       | 0         | 42        | 45                   | 4        |
| <b>C10</b>  | 17        | 299       | 439                  | 137      | 58        | 151       | 126                  | 68       |

Values are normalized by subtraction of isotype control

**Table S7: Overview of the peculiar features of the different TP53 functional assays described by literature.**

|               | Evaluation of TP53 and CDKN1A protein expression by western blot                                                                                                                                         | Evaluation of TP53 and CDKN1A protein expression by FACS                                                                                                                                                                                                    | Evaluation of CDKN1A expression levels by qRT-PCR                                                                                                                                                      | Evaluation of miR34a expression levels by qRT-PCR                                                                                                                                                      | Evaluation of TP53 target expression levels by RT-MLPA                                                                                                                                                 | Evaluation of TP53 protein expression by western blot and CDKN1A expression by qRT-PCR                                                                                                                                                                                |
|---------------|----------------------------------------------------------------------------------------------------------------------------------------------------------------------------------------------------------|-------------------------------------------------------------------------------------------------------------------------------------------------------------------------------------------------------------------------------------------------------------|--------------------------------------------------------------------------------------------------------------------------------------------------------------------------------------------------------|--------------------------------------------------------------------------------------------------------------------------------------------------------------------------------------------------------|--------------------------------------------------------------------------------------------------------------------------------------------------------------------------------------------------------|-----------------------------------------------------------------------------------------------------------------------------------------------------------------------------------------------------------------------------------------------------------------------|
| Method        | TP53 functionality is defined by evaluation of TP53 and CDKN1A protein expression by western blot at basal level and upon activation of DNA-damage pathway by irradiation or drug treatments             | TP53 functionality is defined by evaluation of TP53 and CDKN1A protein expression by FACS at basal level and upon activation of DNA-damage pathway by irradiation or drug treatments                                                                        | TP53 dysfunction is defined by low expression levels of <i>CDKN1A</i>                                                                                                                                  | TP53 dysfunction is defined by low constitutive levels of miR34a                                                                                                                                       | TP53 functionality is defined by evaluation of expression levels of the TP53 targets <i>CDKN1A</i> , <i>BAX</i> , <i>PUMA</i> and <i>CD95</i> by RT-MPLA at basal level and upon irradiation           | TP53 functionality is defined by evaluation of TP53 protein expression by western blot at basal level and upon activation of TP53 by Nutlin-3. TP53 dysfunction is also defined by low expression levels of <i>CDKN1A</i> transcript.                                 |
| Advantages    | Using a combination of etoposide and Nutlin-3 to induce activation of DNA-damage pathway, defects of TP53 and ATM can be detected one from the other<br><br>Higher sensitivity of western blot detection | Using a combination of etoposide and Nutlin-3 to induce activation of DNA-damage pathway, defects of TP53 and ATM can be detected one from the other<br><br>Samples does not need to be purified also in the case of low percentages of CD19-positive cells | Using a combination of etoposide and Nutlin-3 to induce activation of DNA-damage pathway, defects of TP53 and ATM can be detected one from the other                                                   | Activation of TP53 pathway by DNA-damage using irradiation or drugs is not required                                                                                                                    | Using a combination of etoposide and Nutlin-3 to induce activation of DNA-damage pathway, defects of TP53 and ATM can be detected one from the other                                                   | Usage of non-genotoxic Nutlin-3 is safer for the operator<br><br><i>CDKN1A</i> transcript evaluation by qRT-PCR is a more reliable readout of TP53 functional activity than CDKN1A protein levels by western blot<br><br>Higher sensitivity of western blot detection |
| Disadvantages | The assay does not consider the percentage of CD19-positive cells and samples need to be purified if this percentage is low (e.g. <70-80%)<br><br>Low TP53 disrupted clone sizes could not be revealed   | Some problems could occur in the standardization of the method<br><br>Low TP53 disrupted clone sizes could not be revealed                                                                                                                                  | The assay does not consider the percentage of CD19-positive cells and samples need to be purified if this percentage is low (e.g. <70-80%)<br><br>Low TP53 disrupted clone sizes could not be revealed | The assay does not consider the percentage of CD19-positive cells and samples need to be purified if this percentage is low (e.g. <70-80%)<br><br>Low TP53 disrupted clone sizes could not be revealed | The assay does not consider the percentage of CD19-positive cells and samples need to be purified if this percentage is low (e.g. <70-80%)<br><br>Low TP53 disrupted clone sizes could not be revealed | The assay does not consider the percentage of CD19-positive cells and samples need to be purified if this percentage is low (e.g. <70-80%)<br><br>Low TP53 disrupted clone sizes could not be revealed                                                                |



**Table S8. Characterization of CLL cases used for microarray experiments.**

|                                  | Patient ID | GEO code* | <i>IGHV</i> status | FISH       | ZAP-70 expression | CD38 expression | CD49d expression | <i>TP53</i> status                   |
|----------------------------------|------------|-----------|--------------------|------------|-------------------|-----------------|------------------|--------------------------------------|
| <b>Gene expression profiling</b> | GEP1       | GSE18971  | UM                 | 13q-       | pos               | pos             | pos              | WT                                   |
|                                  | GEP2       | GSE18971  | UM                 | +12        | pos               | pos             | neg              | WT                                   |
|                                  | GEP3       | GSE18971  | M                  | +12, 13q-  | neg               | neg             | pos              | WT                                   |
|                                  | GEP4       | GSE18971  | UM                 | 13q-       | neg               | pos             | neg              | WT                                   |
|                                  | GEP5       | GSE18971  | M                  | 13q-       | pos               | neg             | neg              | WT                                   |
|                                  | GEP6       | GSE18971  | UM                 | +12        | pos               | neg             | pos              | WT                                   |
|                                  | GEP7       | GSE18971  | M                  | 13q-       | neg               | neg             | nd               | WT                                   |
|                                  | GEP8       | GSE18971  | UM                 | +12        | pos               | pos             | pos              | WT                                   |
|                                  | GEP9       | GSE18971  | UM                 | 13q-, 11q- | pos               | neg             | nd               | WT                                   |
|                                  | GEP10      | GSE18971  | UM                 | +12        | pos               | pos             | neg              | WT                                   |
|                                  | GEP11      | GSE18971  | UM                 | normal     | pos               | pos             | pos              | WT                                   |
|                                  | GEP12      | GSE18971  | nd                 | nd         | neg               | neg             | nd               | WT                                   |
|                                  | GEP13      | GSE18971  | M                  | 13q-       | neg               | neg             | neg              | WT                                   |
|                                  | GEP17      | GSE18971  | nd                 | 17p-, 13q- | neg               | nd              | nd               | c.476C>T; p.A159V; exon 5            |
|                                  | GEP18      | GSE18971  | UM                 | 17p-, 13q- | pos               | neg             | nd               | c.673-2A>G; intron 6                 |
|                                  | GEP19      | GSE18971  | M                  | 17p-, 13q- | neg               | neg             | nd               | c.817C>A; p.R273S; exon 8            |
|                                  | GEP20      | GSE18971  | UM                 | +12, 17p-  | pos               | neg             | nd               | c.724T>C; p.C242R; exon 7            |
|                                  | GEP21      | GSE18971  | UM                 | 17p-       | pos               | pos             | 60               | c.517G>A; p.V173M; exon 5            |
|                                  | GEP22      | GSE18971  | M                  | 17p-       | neg               | neg             | nd               | c.736_777del; p.M246_D259del; exon 7 |
|                                  | GEP23      | GSE18971  | UM                 | 17p-, 13q- | pos               | neg             | nd               | c.701A>G; p.Y234C; exon 7            |

m, male; f, female; M, mutated *IGHV*; UM, unmutated *IGHV*; normal FISH included cases with normal karyotypes, i.e. lacking 11q-, 13q-, 17p- and chromosome +12;

pos, positive, neg, negative, for ZAP70, CD38 and CD49d expression, according to Gattei et al (2008); nd not determined;

\* identification number of CLL cases analysed by GEP, as reported at <http://www.ncbi.nlm.nih.gov/geo/>
